# Supplementary material for: miR-200a-3p facilitates bladder cancer cell proliferation by targeting the A20 gene
Source: PubMed Central journal article supplement — Transl Androl Urol. 2021 Nov;10(11):4262–74. doi: 10.21037/tau-21-941 (PMC8661264; doi:10.21037/tau-21-941), 2021-11
Supplement: tau-10-11-4262-supplementary.pdf [file tau-10-11-4262-supplementary.pdf]

A

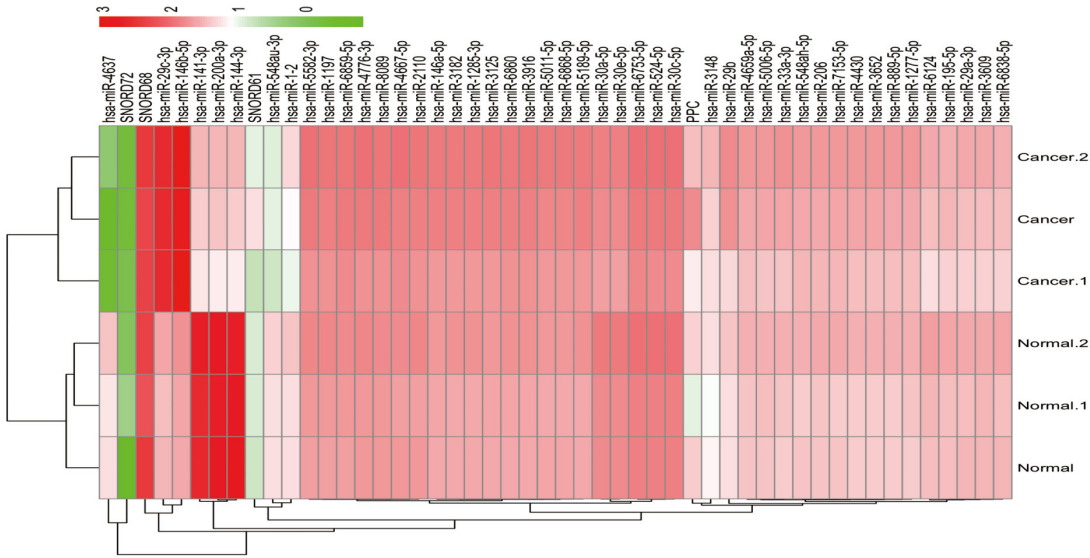

B

| miRNA ID        | Cancer Type    | Design           | logFC | AveExpr | T value | P value | adj Pvalue | Status | Plot |
|-----------------|----------------|------------------|-------|---------|---------|---------|------------|--------|------|
| hsa-miR-205-5p  | bladder cancer | cancer vs normal | 4.94  | 9.58    | 14.84   | 1.43e-9 | 2.65e-7    | UP     |      |
| hsa-miR-200c-3p | bladder cancer | cancer vs normal | 5.77  | 8.96    | 13.16   | 6.26e-9 | 7.72e-7    | UP     |      |
| hsa-miR-944     | bladder cancer | cancer vs normal | 5.62  | 5.82    | 12.49   | 1.19e-8 | 1.20e-6    | UP     |      |
| hsa-miR-107     | bladder cancer | cancer vs normal | 2.67  | 14.76   | 10.74   | 7.27e-8 | 4.48e-6    | UP     |      |
| hsa-miR-1307-3p | bladder cancer | cancer vs normal | 3.32  | 7.68    | 10.22   | 1.30e-7 | 6.89e-6    | UP     |      |
| hsa-miR-141-3p  | bladder cancer | cancer vs normal | 4.68  | 3.96    | 8.61    | 9.32e-7 | 3.70e-5    | UP     |      |
| hsa-miR-135b-5p | bladder cancer | cancer vs normal | 5.42  | 1.19    | 8.36    | 1.31e-6 | 5.02e-5    | UP     |      |
| hsa-miR-4724-5p | bladder cancer | cancer vs normal | 5.36  | -0.48   | 8.02    | 2.06e-6 | 6.54e-5    | UP     |      |
| hsa-miR-21-5p   | bladder cancer | cancer vs normal | 3.67  | 13.40   | 7.92    | 2.39e-6 | 7.16e-5    | UP     |      |
| hsa-miR-191-5p  | bladder cancer | cancer vs normal | 2.28  | 13.18   | 7.22    | 6.43e-6 | 1.49e-4    | UP     |      |
| hsa-miR-6887-3p | bladder cancer | cancer vs normal | 3.62  | -2.70   | 7.08    | 8.00e-6 | 1.75e-4    | UP     |      |
| hsa-miR-210-3p  | bladder cancer | cancer vs normal | 4.18  | 5.73    | 6.96    | 9.57e-6 | 2.04e-4    | UP     |      |
| hsa-miR-7641    | bladder cancer | cancer vs normal | 3.56  | 6.16    | 6.90    | 1.04e-5 | 2.17e-4    | UP     |      |
| hsa-miR-301b-3p | bladder cancer | cancer vs normal | 4.65  | -1.50   | 6.85    | 1.13e-5 | 2.24e-4    | UP     |      |
| hsa-miR-200a-3p | bladder cancer | cancer vs normal | 5.24  | 7.31    | 6.86    | 1.12e-5 | 2.24e-4    | UP     |      |

BoxPlot

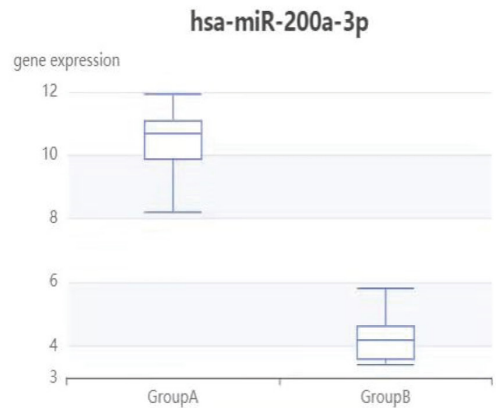

**Group\_A:**  
bladder cancer cancer

**Group\_B:**  
bladder cancer normal

**Figure S1** The expression of miR-200a-3p between bladder cancer and normal tissues. (A) Heat map of Agilent miRNA microarray analysis data of bladder cancer tissues and adjacent nontumor tissues. (B) The expression of miR-200a-3p in cBioPortal database.

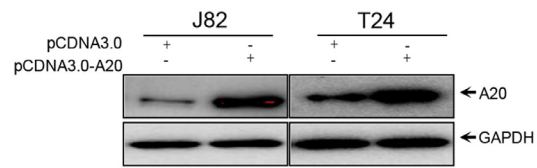

**Figure S2** Transfection efficacy of A20 overexpression vector in J82 and T24 cells. Western blotting was performed to assess the transfection efficiency of pCDNA3.0-A20 in J82 and T24 cells. A20, TNF- $\alpha$ -induced protein 3.
